# Supplementary material for: The deubiquitylase Ubp15 couples transcription to mRNA export
Source: eLife. 2020 Nov 23;9:e61264. doi: 10.7554/eLife.61264 (PMC7682988; doi:10.7554/eLife.61264)
Supplement: Supplementary file 2. [file elife-61264-supp2.xlsx]

## Sheet: Sheet1
ORF name	Gene name	Description	noTag_rep1	noTag_rep2	noTag_rep3	WT_rep1	WT_rep2	WT_rep3	ubp15D_rep1	ubp15D_rep2	ubp15D_rep3	Avg_noTag	Avg_WT	Avg_ubp15D	Avg_noTag	Norm_Avg_WT	Norm_Avg_ubp15D	log2Ratio	-logTtest
YPL169C	MEX67	Poly(A)RNA binding protein involved in nuclear mRNA export; component of the nuclear pore; ortholog of human TAP	0	2	3	771	599	709	835	667	575	1.66667	693	692.333	1.66667	693	693	0	0.00308129
YIL115C	NUP159	FG-nucleoporin component of central core of the nuclear pore complex; also part of the nuclear pore complex (NPC) cytoplasmic filaments; contributes directly to nucleocytoplasmic transport; regulates ADP release from the ATP-dependent RNA helicase Dbp5p; forms a stable association with Nup82p, Gle2p and two other FG-nucleoporins (Nsp1p and Nup116p)	0	4	1	321	225	282	433	338	299	1.66667	276	356.667	1.66667	276	357.01	0.371297	0.896909
YMR129W	POM152	Glycoprotein subunit of transmembrane ring of nuclear pore complex; contributes to nucleocytoplasmic transport, nuclear pore complex (NPC) biogenesis and spindle pole body duplication; homologous to human NUP210	3	10	4	128	118	141	239	189	166	5.66667	129	198	5.66667	129	198.191	0.619518	0.963004
YJL061W	NUP82	Linker nucleoporin component of the nuclear pore complex (NPC); also part of the NPC cytoplasmic filaments; contributes to nucleocytoplasmic transport and NPC biogenesis; forms stable associations with three FG-nucleoporins (Nsp1p, Nup159p, and Nup116p); relocalizes to the cytosol in response to hypoxia	0	0	0	138	111	150	206	207	158	0	133	190.333	0	133	190.517	0.518491	0.801801
YJL041W	NSP1	FG-nucleoporin component of central core of the nuclear pore complex; also part of the nuclear pore complex (NPC) nuclear basket; contributes directly to nucleocytoplasmic transport and maintenance of the NPC permeability barrier; found in stable complex with Nup82p, Gle2p and two other FG-nucleoporins (Nup159p and Nup116p); also found in stable complex with Nic96p and two other FG-nucleoproteins…	2	5	2	202	97	108	263	165	115	3	135.667	181	3	135.667	181.174	0.417312	0.844742
YJL039C	NUP192	Essential subunit of the inner ring of the nuclear pore complex (NPC); contributes to nucleocytoplasmic transport; homologous to human NUP205	0	4	8	89	79	97	145	123	77	4	88.3333	115	4	88.3333	115.111	0.381993	0.425263
YBL079W	NUP170	Subunit of the inner ring of the nuclear pore complex (NPC); contributes to NPC assembly and nucleocytoplasmic transport; both Nup170p and NUP157p are similar to human Nup155p; NUP170 has a paralog, NUP157, that arose from the whole genome duplication	0	1	2	96	62	76	171	92	66	1	78	109.667	1	78	109.772	0.492968	0.486597
YER107C	GLE2	RNA export factor associated with the nuclear pore complex (NPC); associates with NUP116p; required for polyadenylated RNA export but not for protein import; homologous to S. pombe Rae1p and human RAE1	5	3	3	125	70	61	114	91	79	3.66667	85.3333	94.6667	3.66667	85.3333	94.7578	0.151136	0.34018
YGL122C	NAB2	Nuclear polyadenylated RNA-binding protein; required for nuclear mRNA export and poly(A) tail length control; binds nuclear pore protein Mlp1p; involved in forming export-competent mRNPs in the nucleus; autoregulates mRNA levels; related to human hnRNPs; nuclear localization sequence binds Kap104p; protein abundance increases in response to DNA replication stress	3	4	5	83	89	72	80	75	62	4	81.3333	72.3333	4	81.3333	72.403	-0.167798	0.968965
YKL186C	MTR2	mRNA transport regulator; essential nuclear protein; Mex67p and Mtr2p form a mRNA export complex which binds to RNA	0	0	0	96	68	74	94	67	77	0	79.3333	79.3333	0	79.3333	79.4097	0.00138854	0
YDR101C	ARX1	Nuclear export factor for the ribosomal pre-60S subunit; shuttling factor which directly binds FG rich nucleoporins and facilities translocation through the nuclear pore complex; interacts directly with Alb1p; responsible for Tif6p recycling defects in the absence of Rei1; associated with the ribosomal export complex	6	6	5	102	74	76	70	59	43	5.66667	84	57.3333	5.66667	84	57.3885	-0.549627	1.34899
YKR095W	MLP1	Myosin-like protein associated with the nuclear envelope; nuclear basket protein that connects the nuclear pore complex with the nuclear interior; involved with Tel1p in telomere length control; involved with Pml1p and Pml39p in nuclear retention of unspliced mRNAs; MLP1 has a paralog, MLP2, that arose from the whole genome duplication	3	6	4	59	41	42	115	80	87	4.33333	47.3333	94	4.33333	47.3333	94.0905	0.991193	1.95129
YFR002W	NIC96	Linker nucleoporin component of the nuclear pore complex (NPC); also part of the NPC nuclear basket; contributes to nucleocytoplasmic transport and NPC biogenesis; forms stable associations with three FG-nucleoporins (Nsp1p, Nup57p, and Nup49p)	0	2	2	79	39	50	144	64	38	1.33333	56	82	1.33333	56	82.079	0.551586	0.440392
YML103C	NUP188	Subunit of the inner ring of the nuclear pore complex (NPC); contributes to NPC organization and nucleocytoplasmic transport; homologous to human NUP188	0	2	2	64	55	51	108	85	68	1.33333	56.6667	87	1.33333	56.6667	87.0838	0.619904	1.22072
YER105C	NUP157	Subunit of the inner ring of the nuclear pore complex (NPC); contributes to NPC assembly and tethering of DNA to the nuclear periphery; both Nup170p and NUP157p are similar to human Nup155p; NUP157 has a paralog, NUP170, that arose from the whole genome duplication	4	2	2	73	35	33	116	52	22	2.66667	47	63.3333	2.66667	47	63.3943	0.431693	0.392781
YGL092W	NUP145	Essential protein with distinct roles in two nuclear pore subcomplexes; catalyzes its own proteolytic cleavage in vivo to generate a C-terminal fragment that is a structural component of the Nup84p subcomplex (with roles in NPC biogenesis and localization of genes to the nuclear periphery), and an N-terminal fragment that is one of several FG-nucleoporins within the NPC central core directly resp…	0	3	2	35	42	52	65	75	71	1.66667	43	70.3333	1.66667	43	70.4011	0.71126	1.63089
YKL057C	NUP120	Subunit of the Nup84p subcomplex of the nuclear pore complex (NPC); contributes to nucleocytoplasmic transport and NPC biogenesis and is involved in establishment of a normal nucleocytoplasmic concentration gradient of the GTPase Gsp1p; also plays roles in several processes that may require localization of genes or chromosomes at the nuclear periphery, including double-strand break repair, transc…	0	0	2	31	44	52	53	66	61	0.666667	42.3333	60	0.666667	42.3333	60.0578	0.504557	1.25785
YKR082W	NUP133	Subunit of Nup84p subcomplex of nuclear pore complex (NPC); contributes to nucleocytoplasmic transport, NPC biogenesis; is involved in establishment of a normal nucleocytoplasmic concentration gradient of GTPase Gsp1p; also plays roles in several processes that may require localization of genes or chromosomes at nuclear periphery, including double-strand break repair, transcription and chromatin …	0	2	2	36	39	43	71	67	56	1.33333	39.3333	64.6667	1.33333	39.3333	64.7289	0.718658	1.22336
YLR335W	NUP2	Nucleoporin involved in nucleocytoplasmic transport; binds to either the nucleoplasmic or cytoplasmic faces of the nuclear pore complex depending on Ran-GTP levels; also has a role in chromatin organization	6	3	1	56	33	23	96	45	25	3.33333	37.3333	55.3333	3.33333	37.3333	55.3866	0.569073	0.594649
YMR153W	NUP53	FG-nucleoporin component of central core of nuclear pore complex (NPC); also part of the NPC nuclear basket; contributes directly to nucleocytoplasmic transport; involved in regulation of transcription and mitosis; induces membrane tubulation, which may contribute to nuclear pore assembly; NUP53 has a paralog, ASM4, that arose from the whole genome duplication	0	1	1	33	30	20	58	53	52	0.666667	27.6667	54.3333	0.666667	27.6667	54.3857	0.975077	1.98686
YHR170W	NMD3	Protein involved in nuclear export of the large ribosomal subunit; acts as a Crm1p-dependent adapter protein for export of nascent ribosomal subunits through the nuclear pore complex	0	2	3	65	53	54	45	38	33	1.66667	57.3333	38.6667	1.66667	57.3333	38.7039	-0.566895	2.0114
YDL116W	NUP84	Subunit of the Nup84p subcomplex of the nuclear pore complex (NPC); contributes to nucleocytoplasmic transport and NPC biogenesis; also plays roles in several processes that may require localization of genes or chromosomes at the nuclear periphery, including double-strand break repair, transcription and chromatin silencing; homologous to human NUP107	0	0	0	29	30	42	42	57	44	0	33.6667	47.6667	0	33.6667	47.7126	0.503048	0.71533
YAR002W	NUP60	FG-nucleoporin component of central core of the nuclear pore complex; contributes directly to nucleocytoplasmic transport and maintenance of the nuclear pore complex (NPC) permeability barrier and is involved in gene tethering at the nuclear periphery; relocalizes to the cytosol in response to hypoxia; both NUP1 and NUP60 are homologous to human NUP153	0	5	2	43	20	21	64	46	56	2.33333	28	55.3333	2.33333	28	55.3866	0.984111	1.66299
YML031W	NDC1	Subunit of the transmembrane ring of the nuclear pore complex (NPC); contributes to nucleocytoplasmic transport, NPC biogenesis and spindle pole body duplication; homologous to human NDC1	1	5	7	26	27	31	48	46	34	4.33333	28	42.6667	4.33333	28	42.7078	0.609071	0.883681
YLR347C	KAP95	Karyopherin beta; forms a complex with Srp1p/Kap60p; interacts with nucleoporins to mediate nuclear import of NLS-containing cargo proteins via the nuclear pore complex; regulates PC biosynthesis; GDP-to-GTP exchange factor for Gsp1p	0	5	2	46	24	44	61	34	21	2.33333	38	38.6667	2.33333	38	38.7039	0.0264795	0.0175085
YKL214C	YRA2	Member of the REF (RNA and export factor binding proteins) family; when overexpressed, can substitute for the function of Yra1p in export of poly(A)+ mRNA from the nucleus	0	0	1	44	40	36	40	34	39	0.333333	40	37.6667	0.333333	40	37.7029	-0.0853231	0.316462
YDL207W	GLE1	Cytoplasmic nucleoporin required for polyadenylated mRNA export; contains a nuclear export signal; when bound to inositol hexakisphosphate (IP6), functions as an activator for the Dbp5p ATPase activity at the nuclear pore complex during mRNA export; mediates translation initiation; required for efficient translation termination	0	0	0	55	19	20	49	27	57	0	31.3333	44.3333	0	31.3333	44.376	0.502082	0.384555
YHR127W	YHR127W	Protein of unknown function; localizes to the nucleus; required for asymmetric localization of Kar9p during mitosis	5	3	6	57	35	34	25	20	18	4.66667	42	21	4.66667	42	21.0202	-0.998611	1.20473
YMR125W	STO1	Large subunit of the nuclear mRNA cap-binding protein complex; interacts with Npl3p to carry nuclear poly(A)+ mRNA to cytoplasm; also involved in nuclear mRNA degradation and telomere maintenance; orthologous to mammalian CBP80	0	0	0	47	45	49	17	26	4	0	47	15.6667	0	47	15.6818	-1.58357	1.27365
YAL059W	ECM1	Pre-ribosomal factor involved in 60S ribosomal protein subunit export; associates with the pre-60S particle; shuttles between the nucleus and cytoplasm	0	0	0	28	27	27	14	28	12	0	27.3333	18	0	27.3333	18.0173	-0.601276	0.671496
YNL189W	SRP1	Karyopherin alpha homolog; forms a dimer with karyopherin beta Kap95p to mediate import of nuclear proteins, binds the nuclear localization signal of the substrate during import; involved in cotranslational protein degradation; binds ribosome-bound nascent polypeptides; Srp1p and Sts1p couple proteasomes to nascent polypeptides emerging from the ribosome for cotranslational degradation	2	7	5	24	21	17	43	25	12	4.66667	20.6667	26.6667	4.66667	20.6667	26.6923	0.36912	0.317242
YJR042W	NUP85	Subunit of the Nup84p subcomplex of the nuclear pore complex (NPC); contributes to nucleocytoplasmic transport and NPC biogenesis and is involved in establishment of a normal nucleocytoplasmic concentration gradient of the GTPase Gsp1p; also plays roles in several processes that may require localization of genes or chromosomes at the nuclear periphery, including double-strand break repair, transc…	0	0	0	13	20	29	28	33	28	0	20.6667	29.6667	0	20.6667	29.6952	0.522926	0.666231
YNL139C	THO2	Subunit of the THO complex; THO is required for efficient transcription elongation and involved in transcriptional elongation-associated recombination; required for LacZ RNA expression from certain plasmids	1	0	1	54	37	33	12	1	0	0.666667	41.3333	4.33333	0.666667	41.3333	4.33751	-3.25237	2.29462
YDR138W	HPR1	Subunit of THO/TREX complexes; this complex couple transcription elongation with mitotic recombination and with mRNA metabolism and export, subunit of an RNA Pol II complex; regulates lifespan; involved in telomere maintenance; similar to Top1p	0	1	1	34	38	31	9	9	4	0.666667	34.3333	7.33333	0.666667	34.3333	7.34039	-2.22568	2.73898
YLR018C	POM34	Subunit of the transmembrane ring of the nuclear pore complex (NPC); contributes to nucleocytoplasmic transport, NPC biogenesis and spindle pole body duplication	0	2	0	15	14	9	44	24	16	0.666667	12.6667	28	0.666667	12.6667	28.027	1.14578	0.807077
YDR424C	DYN2	Cytoplasmic light chain dynein, microtubule motor protein; required for intracellular transport and cell division; involved in mitotic spindle positioning; forms complex with dynein intermediate chain Pac11p that promotes Dyn1p homodimerization, potentiates motor processivity; Dyn2p-Pac11p complex important for interaction of dynein motor complex with dynactin complex; acts as molecular glue to d…	0	0	0	22	19	18	27	19	23	0	19.6667	23	0	19.6667	23.0221	0.22727	0.736356
YHR167W	THP2	Subunit of the THO and TREX complexes; THO connects transcription elongation and mitotic recombination, and TREX is recruited to activated genes and couples transcription to mRNA export; involved in telomere maintenance	0	2	0	23	18	29	12	7	4	0.666667	23.3333	7.66667	0.666667	23.3333	7.67405	-1.60433	1.10551
YML062C	MFT1	Subunit of the THO complex; THO is a nuclear complex comprised of Hpr1p, Mft1p, Rlr1p, and Thp2p, that is involved in transcription elongation and mitotic recombination; involved in telomere maintenance	0	0	2	33	26	29	5	9	2	0.666667	29.3333	5.33333	0.666667	29.3333	5.33847	-2.45804	1.68302
YKL068W	NUP100	FG-nucleoporin component of central core of the nuclear pore complex; contributes directly to nucleocytoplasmic transport and maintenance of the nuclear pore complex (NPC) permeability barrier and is involved in gene tethering at the nuclear periphery; NUP100 has a paralog, NUP116, that arose from the whole genome duplication	0	0	0	32	3	3	48	7	1	0	12.6667	18.6667	0	12.6667	18.6846	0.560816	0.426598
YBR275C	RIF1	Protein that binds to the Rap1p C-terminus; acts synergistically with Rif2p to help control telomere length and establish telomeric silencing; contributes to resection of DNA double strand breaks (DSBs); deletion results in telomere elongation	0	3	3	20	10	12	18	6	6	2	14	10	2	14	10.0096	-0.484038	1.12971
YOR252W	TMA16	Protein of unknown function that associates with ribosomes	0	2	2	15	12	14	13	13	13	1.33333	13.6667	13	1.33333	13.6667	13.0125	-0.0707612	0.276877
YLR074C	BUD20	C2H2-type zinc finger protein required for ribosome assembly; shuttling factor which associates with pre-60S particles in the nucleus, accompanying them to the cytoplasm; cytoplasmic dissociation of Bud20p requires Drg1p; N-terminus harbors a nuclear localization signal (NLS) and a nuclear export signal (NES); cytoplasmic Bud20p is reimported by Kap123-dependent pathway; involved in bud-site sele…	0	0	0	33	8	9	25	4	0	0	16.6667	9.66667	0	16.6667	9.67597	-0.784487	1.35196
YLL036C	PRP19	Splicing factor associated with the spliceosome; contains a U-box, a motif found in a class of ubiquitin ligases, and a WD40 domain; relocalizes to the cytosol in response to hypoxia	1	2	2	11	19	16	5	10	5	1.66667	15.3333	6.66667	1.66667	15.3333	6.67309	-1.20025	1.56905
YBR111W-A	SUS1	Component of both the SAGA histone acetylase and TREX-2 complexes; interacts with RNA polymerase II; involved in mRNA export coupled transcription activation and elongation; involved in post-transcriptional tethering of active genes to the nuclear periphery and to non-nascent mRNP	0	4	2	9	7	11	11	15	17	2	9	14.3333	2	9	14.3471	0.672766	1.02605
YJL122W	ALB1	Shuttling pre-60S factor; involved in the biogenesis of ribosomal large subunit; interacts directly with Arx1p; responsible for Tif6p recycling defects in absence of Rei1p	2	0	3	16	14	14	13	10	5	1.66667	14.6667	9.33333	1.66667	14.6667	9.34232	-0.650688	0.988157
YMR047C	NUP116	FG-nucleoporin component of central core of the nuclear pore complex; contributes directly to nucleocytoplasmic transport and maintenance of the nuclear pore complex (NPC) permeability barrier; forms a stable association with Nup82p, Gle2p and two other FG-nucleoporins (Nsp1p and Nup159p); NUP116 has a paralog, NUP100, that arose from the whole genome duplication	0	0	0	26	0	1	40	1	1	0	9	14	0	9	14.0135	0.638818	0.416821
YPL178W	CBC2	Small subunit of the heterodimeric cap binding complex with Sto1p; interacts with Npl3p, possibly to package mRNA for export from the nucleus; may have a role in telomere maintenance; contains an RNA-binding motif	0	0	0	15	12	9	7	3	5	0	12	5	0	12	5.00481	-1.26165	1.35196
