# Supplementary material for: The deubiquitylase Ubp15 couples transcription to mRNA export
Source: eLife. 2020 Nov 23;9:e61264. doi: 10.7554/eLife.61264 (PMC7682988; doi:10.7554/eLife.61264)
Supplement: Supplementary file 3. [file elife-61264-supp3.xlsx]

## Sheet: Sheet1
Strain	Alias	Genotype	Source
yFR117	204508	MATa, his3Δ1, leu2Δ0, met15Δ0, ura3Δ0	Open Biosystems
yFR116	Z1256	MATa, ade2-1, trp1-1, can1-100, leu2-3,112, his3-11,15, ura3	Ren et al., 2000
yFR2014		MATa, his3Δ1, leu2Δ0, met15Δ0, ura3Δ0::URA3	This study
yFR2031		MATa, ade2-1, trp1-1, can1-100, leu2-3,112, his3-11,15, ura3::URA3	This study
yFR1003	YF235 (YMK219)	MATα, trp1-1, ura3-1, his3-11,15, leu2-3,112, ade2-1, can1-100, fcp1Δ::LEU2, [p(FCP1 ADE2 C/A)]	M. Kobor (Kobor et al., 1999)
yFR1004	YF236 (YMK220)	MATα, trp1-1, ura3-1, his3-11,15, leu2-3,112, ade2-1, can1-100, fcp1Δ::LEU2, [p(fcp1-1 ADE2 C/A)]	M. Kobor (Kobor et al., 1999)
yFR1099		MATα, trp1-1, ura3-1, his3-11,15, leu2-3,112, ade2-1, can1-100, fcp1Δ::LEU2, [p(FCP1 ADE2 C/A)] [pFR399; p(CEN, HIS3, RPB1-TAP)]	This study
yFR1107		MATα, trp1-1, ura3-1, his3-11,15, leu2-3,112, ade2-1, can1-100, fcp1Δ::LEU2, [p(fcp1-1 ADE2 C/A)] [pFR399; p(CEN, HIS3, RPB1-TAP)]	This study
yFR1226	YSC1178-7502312	MATa, his3Δ1, leu2Δ0, met15Δ0, ura3Δ0, UBP15::TAP::HIS3MX6	Open Biosystems
yFR1225	Y00892	MATa, his3Δ1, leu2Δ0, met15Δ0, ura3Δ0, ubp15D::KanMX4	Euroscarf
yFR2009		MATa, ade2-1, trp1-1, can1-100, leu2-3,112, his3-11,15, ura3, ubp15D::KanMX4	This study
yFR2028		MATa, his3Δ1, leu2Δ0, met15Δ0, ura3Δ0::URA3, ubp15Δ::KanMX4	This study
yFR2032		MATa, ade2-1, trp1-1, can1-100, leu2-3,112, his3-11,15, ura3::URA3, ubp15Δ::KanMX4	This study
yFR2030		MATa, his3Δ1, leu2Δ0, met15Δ0, ura3Δ0::URA3, dst1D::LEU2	This study
yFR2029		MATa, his3Δ1, leu2Δ0, met15Δ0, ura3Δ0::URA3, ubp15D::KanMX4, dst1D::LEU2	This study
yFR2077		MATa, his3Δ1, leu2Δ0, met15Δ0, ura3Δ0, spt4D::URA3	This study
yFR2078		MATa, his3Δ1, leu2Δ0, met15Δ0, ura3Δ0, ubp15D::KanMX4, spt4D::URA3	This study
yFR2161		MATa, his3Δ1, leu2Δ0, met15Δ0, ura3Δ0::URA3, ubp15D::KanMX4, [pFRFR559; p(CEN, HIS3, UBP15-3Flag)]	This study
yFR2155		MATa, his3Δ1, leu2Δ0, met15Δ0, ura3Δ0::URA3, ubp15D::KanMX4, [pFRFR560; p(CEN, HIS3, ubp15-C214A-3Flag)]	This study
yFR2162		MATa, his3Δ1, leu2Δ0, met15Δ0, ura3Δ0::URA3, ubp15D::KanMX4, dst1D::LEU2, [pFRFR559; p(CEN, HIS3, UBP15-3Flag)]	This study
yFR2156		MATa, his3Δ1, leu2Δ0, met15Δ0, ura3Δ0::URA3, ubp15D::KanMX4, dst1D::LEU2, [pFRFR560; p(CEN, HIS3, ubp15-C214A-3Flag)]	This study
yFR2305		MATa, his3Δ1, leu2Δ0, met15Δ0, ura3Δ0::URA3, ubp15D::KanMX4, dst1D::LEU2, [pFR2; p(CEN, HIS3)]	This study
yFR2322		MATa, his3Δ1, leu2Δ0, met15Δ0, ura3Δ0, ubp15D::KanMX4, spt4D::URA3, [pFRFR559; p(CEN, HIS3, UBP15-3Flag)]	This study
yFR2323		MATa, his3Δ1, leu2Δ0, met15Δ0, ura3Δ0, ubp15D::KanMX4, spt4D::URA3, [pFRFR560; p(CEN, HIS3, ubp15-C214A-3Flag)]	This study
yFR2324		MATa, his3Δ1, leu2Δ0, met15Δ0, ura3Δ0, ubp15Δ::KanMX4, spt4Δ::URA3, [pFR2; p(CEN, HIS3)]	This study
yFR2610	DY7525	MATa, ade2, can1, his3, leu2, lys2, met15, spt16-11	D. Stillman
yFR2722	Y41198/TSA816	MATa, his3Δ1, leu2Δ0, met15Δ0, ura3Δ0, mex67-5:KanMX	Euroscarf
yFR1029		MATa, ade2-1, trp1-1, can1-100, leu2-3,112, his3-11,15, ura3, rad6D::LEU2	This study
yFR2397		MATa, ade2-1, trp1-1, can1-100, leu2-3,112, his3-11,15, ura3::URA3, spt5Δ842-1063	This study
yFR2404		MATa, ade2-1, trp1-1, can1-100, leu2-3,112, his3-11,15, ura3::URA3, spt5Δ842-1063, ubp15Δ::KanMX4	This study
yFR2360		MATa, leu2Δ1, lys2-128Δ, trp1Δ63, ura3-52::URA3	This study
yFR2361		MATα, his3Δ200, leu2Δ1, lys2-128Δ, ura3-52::URA3, spt6-1004-Flag	This study
yFR2487		MATa, leu2Δ1, lys2-128Δ, trp1Δ63, ura3-52, ubp15D::URA3	This study
yFR2488		MATα, his3Δ200, leu2Δ1, lys2-128Δ, ura3-52, spt6-1004-Flag, ubp15D::URA3	This study
yFR2578		MATa, his3Δ1, leu2Δ0, met15Δ0, ura3Δ0::URA3, hpr1Δ::KanMX	This study
yFR2579		MATa, his3Δ1, leu2Δ0, met15Δ0, ura3Δ0::URA3, hpr1Δ::KanMX , ubp15Δ::HphNT1	This study
yFR2074		MATa, ade2-1, trp1-1, can1-100, leu2-3,112, his3-11,15, ura3, bur2Δ::URA3	This study
yFR2080		MATa, ade2-1, trp1-1, can1-100, leu2-3,112, his3-11,15, ura3, bur2Δ::URA3, ubp15Δ::KanMX4	This study
yFR756		MATa, ade2-1, trp1-1, can1-100, leu2-3,112, his3-11,15, ura3, ctk1Δ::URA3	This study
yFR2301		MATa, ade2-1, trp1-1, can1-100, leu2-3,112, his3-11,15, ura3, ctk1Δ::URA3, ubp15Δ:KanMX4	This study
yFR783		MATa, ade2-1, trp1-1, can1-100, leu2-3,112, his3-11,15, ura3, rtf1Δ::URA3	This study
yFR2357		MATa, ade2-1, trp1-1, can1-100, leu2-3,112, his3-11,15, ura3, rtf1Δ::URA3, up15Δ::KanMX4	This study
yFR703		MATa, ade2-1, trp1-1, can1-100, leu2-3,112, his3-11,15, ura3, cdc73Δ::URA3	This study
yFR2642		MATa, ade2-1, trp1-1, can1-100, leu2-3,112, his3-11,15, ura3, cdc73Δ::URA3, ubp15Δ::KanMX4	This study
yFR1091		MATa, his3Δ1, leu2Δ0, met 15Δ0, ura3Δ0, GAL1-YLR454W (URA+)	K. Struhl (Mason and Struhl, 2005)
yFR2067		MATa, his3Δ1, leu2Δ0, met 15Δ0, ura3Δ0, GAL1-YLR454W (URA+), ubp15D::KanMX4	This study
yFR2054		MATa, his3Δ1, leu2Δ0, met 15Δ0, ura3Δ0, GAL1-YLR454W (URA+), dst1D::LEU2	This study
yFR2068		MATa, his3Δ1, leu2Δ0, met 15Δ0, ura3Δ0, GAL1-YLR454W (URA+), dst1D::LEU2, ubp15D::KanMX4	This study
yFR2373	FY56	MATα, his4-912ΔR5, lys2-128Δ, ura3-52	J.M. Huibregtse (Huibregtse et al. 1997)
yFR2374	FW1808	MATα, his4-912ΔR5, lys2-128Δ, ura3-52, rsp5-1	J.M. Huibregtse (Wang et al. 1999)
yFR2633		MATα, his4-912ΔR5, lys2-128Δ, ura3-52, ubp15Δ::KanMX4	This study
yFR2634		MATα, his4-912ΔR5, lys2-128Δ, ura3-52, rsp5-1, ubp15Δ::KanMX4	This study
yFR2393		MATα, his4-912ΔR5, lys2-128Δ, ura3-52::URA3	This study
yFR2394		MATα, his4-912ΔR5, lys2-128Δ, ura3-52::URA3, rsp5-1	This study
yFR2528		MATα, his4-912ΔR5, lys2-128Δ, ura3-52, dst1Δ::URA3	This study
yFR2529		MATα, his4-912ΔR5, lys2-128Δ, ura3-52, rsp5-1, dst1Δ::URA3	This study
yFR2581		MATα, his4-912ΔR5, lys2-128Δ, ura3-52::URA3, rsp5-1, ubp15Δ::KanMX4	This study
yFR2598		MATα, his4-912ΔR5, lys2-128Δ, ura3-52, rsp5-1, dst1Δ::URA3, ubp15Δ::KanMX4	This study
yFR2718	Y00000	MATa, his3Δ1, leu2Δ0, met15Δ0, ura3Δ0	Euroscarf
yFR2732		MATa, his3Δ1, leu2Δ0, met15Δ0, ura3Δ0, ubp15Δ::HphNT1	This study
yFR2719	Y40730	MATa, his3Δ1, leu2Δ0, met15Δ0, ura3Δ0, rsp5-1:KanMX	Euroscarf
yFR2720	Y40937	MATa, his3Δ1, leu2Δ0, met15Δ0, ura3Δ0, rsp5-sm1:KanMX	Euroscarf
yFR2721	Y40938	MATa, his3Δ1, leu2Δ0, met15Δ0, ura3Δ0, rsp5-3:KanMX	Euroscarf
yFR2879		MATa, his3Δ1, leu2Δ0, met15Δ0, ura3Δ0, rsp5-1:KanMX, ubp15Δ::hphNT1	This study
yFR2880		MATa, his3Δ1, leu2Δ0, met15Δ0, ura3Δ0, rsp5-sm1:KanMX, ubp15Δ::hphNT1	This study
yFR2881		MATa, his3Δ1, leu2Δ0, met15Δ0, ura3Δ0, rsp5-3:KanMX, ubp15Δ::hphNT1	This study
yFR2680		MATa, his3Δ1, leu2Δ0, met15Δ0, ura3Δ0, rsp5-1:KanMX, ubp15Δ::hphNT1, [pFRFR559; p(CEN, HIS3, UBP15-3Flag)]	This study
yFR2681		MATa, his3Δ1, leu2Δ0, met15Δ0, ura3Δ0, rsp5-1:KanMX, ubp15Δ::hphNT1, [pFRFR560; p(CEN, HIS3, ubp15-C214A-3Flag)]	This study
yFR2682		MATa, his3Δ1, leu2Δ0, met15Δ0, ura3Δ0, rsp5-1:KanMX, ubp15Δ::hphNT1, [pFR2; p(CEN, HIS3)]	This study
yFR2383		MATa, his3Δ1, leu2Δ0, met15Δ0, ura3Δ0::URA3, asr1D::natMX	This study
yFR2386		MATa, his3Δ1, leu2Δ0, met15Δ0, ura3Δ0::URA3, dst1D::LEU2, asr1D::natMX	This study
yFR2631		MATa, his3Δ1, leu2Δ0, met15Δ0, ura3Δ0::URA3, san1D::KanMX4	This study
yFR2632		MATa, his3Δ1, leu2Δ0, met15Δ0, ura3Δ0::URA3, dst1D::LEU2, san1D::KanMX4	This study
yFR2546		MATa, his3Δ1, leu2Δ0, met15Δ0, ura3Δ0::URA3, tom1D::KanMX4	This study
yFR2547		MATa, his3Δ1, leu2Δ0, met15Δ0, ura3Δ0, tom1D::KanMX4, dst1D::URA3	This study
yFR2034		MATa, ade2-1, trp1-1, can1-100, leu2-3,112, his3-11,15, ura3Δ0::URA3, dst1D::LEU2	This study
yFR2171		MATa, ade2-1, trp1-1, can1-100, leu2-3,112, his3-11,15, ura3Δ0::URA3, elc1D::KanMX4	This study
yFR2172		MATa, ade2-1, trp1-1, can1-100, leu2-3,112, his3-11,15, ura3Δ0::URA3, dst1D::LEU2, elc1D::KanMX4	This study
yFR2167		MATa, ade2-1, trp1-1, can1-100, leu2-3,112, his3-11,15, ura3Δ0::URA3, ela1D::KanMX4	This study
yFR2168		MATa, ade2-1, trp1-1, can1-100, leu2-3,112, his3-11,15, ura3Δ0::URA3, dst1D::LEU2, ela1D::KanMX4	This study
yFR3012		MATa, his3Δ1, leu2Δ0, met15Δ0, ura3Δ0, MEX67::6HA-HIS3MX6, [pFR452; p(2µ, LEU2, CUP1-Ub)]	This study
yFR3013		MATa, his3Δ1, leu2Δ0, met15Δ0, ura3Δ0, MEX67::6HA-HIS3MX6, [pFR453, p(2µ, LEU2, CUP1-MYC-His6-Ub)]	This study
yFR3014		MATa, his3Δ1, leu2Δ0, met15Δ0, ura3Δ0, ubp15Δ::KanMX4, MEX67::6HA-HIS3MX6, [pFR452; p(2µ, LEU2, CUP1-Ub)]	This study
yFR3015		MATa, his3Δ1, leu2Δ0, met15Δ0, ura3Δ0, ubp15Δ::KanMX4, MEX67::6HA-HIS3MX6, [pFR453; p(2µ, LEU2, CUP1-MYC-His6-Ub)]	This study
yFR3051		MATa, his3Δ1, leu2Δ0, met15Δ0, ura3Δ0, rsp5-1:KanMX, MEX67::6HA-HIS3MX6, [pFR452; p(2µ, LEU2, CUP1-Ub)]	This study
yFR3052		MATa, his3Δ1, leu2Δ0, met15Δ0, ura3Δ0, rsp5-1:KanMX, MEX67::6HA-HIS3MX6, [pFR453, p(2µ, LEU2, CUP1-MYC-His6-Ub)]	This study
yFR3082		MATa, his3Δ1, leu2Δ0, met15Δ0, ura3Δ0, rsp5-1:KanMX, ubp15Δ::hphR, MEX67::6HA-HIS3MX6, [pFR452; p(2µ, LEU2, CUP1-Ub)]	This study
yFR3083		MATa, his3Δ1, leu2Δ0, met15Δ0, ura3Δ0, rsp5-1:KanMX, ubp15Δ::hphR, MEX67::6HA-HIS3MX6, [pFR453; p(2µ, LEU2, CUP1-MYC-His6-Ub)]	This study
yFR2707		MATa, his3Δ1, leu2Δ0, met15Δ0, ura3Δ0, NUP82::6HA-HIS3MX6, [pFR452; p(2µ, LEU2, CUP1-Ub)]	This study
yFR2708		MATa, his3Δ1, leu2Δ0, met15Δ0, ura3Δ0, NUP82::6HA-HIS3MX6, [pFR453; p(2µ, LEU2, CUP1-MYC-His6-Ub)]	This study
yFR2709		MATa, his3Δ1, leu2Δ0, met15Δ0, ura3Δ0, ubp15Δ::KanMX4, NUP82::6HA-HIS3MX6, [pFR452; p(2µ, LEU2, CUP1-Ub)]	This study
yFR2710		MATa, his3Δ1, leu2Δ0, met15Δ0, ura3Δ0, ubp15Δ::KanMX4, NUP82::6HA-HIS3MX6, [pFR453; p(2µ, LEU2, CUP1-MYC-His6-Ub)]	This study
yFR2728		MATa, his3Δ1, leu2Δ0, met15Δ0, ura3Δ0, NUP133::6HA-HIS3MX6, [pFR452; p(2µ, LEU2, CUP1-Ub)]	This study
yFR2729		MATa, his3Δ1, leu2Δ0, met15Δ0, ura3Δ0, NUP133::6HA-HIS3MX6, [pFR453; p(2µ, LEU2, CUP1-MYC-His6-Ub)]	This study
yFR2730		MATa, his3Δ1, leu2Δ0, met15Δ0, ura3Δ0, ubp15Δ::KanMX4, NUP133::6HA-HIS3MX6, [pFR452; p(2µ, LEU2, CUP1-Ub)]	This study
yFR2731		MATa, his3Δ1, leu2Δ0, met15Δ0, ura3Δ0, ubp15Δ::KanMX4, NUP133::6HA-HIS3MX6, [pFR453; p(2µ, LEU2, CUP1-MYC-His6-Ub)]	This study
yFR2906		MATa, his3Δ1, leu2Δ0, met15Δ0, ura3Δ0, NUP57::6HA-HIS3MX6, [pFR452; p(2µ, LEU2, CUP1-Ub)]	This study
yFR2907		MATa, his3Δ1, leu2Δ0, met15Δ0, ura3Δ0, NUP57::6HA-HIS3MX6, [pFR453; p(2µ, LEU2, CUP1-MYC-His6-Ub)]	This study
yFR2908		MATa, his3Δ1, leu2Δ0, met15Δ0, ura3Δ0, ubp15Δ::KanMX4, NUP57::6HA-HIS3MX6, [pFR452; p(2µ, LEU2, CUP1-Ub)]	This study
yFR2909		MATa, his3Δ1, leu2Δ0, met15Δ0, ura3Δ0, ubp15Δ::KanMX4, NUP57::6HA-HIS3MX6, [pFR453; p(2µ, LEU2, CUP1-MYC-His6-Ub)]	This study
yFR2910		MATa, his3Δ1, leu2Δ0, met15Δ0, ura3Δ0, NUP120::6HA-HIS3MX6, [pFR452; p(2µ, LEU2, CUP1-Ub)]	This study
yFR2911		MATa, his3Δ1, leu2Δ0, met15Δ0, ura3Δ0, NUP120::6HA-HIS3MX6, [pFR453; p(2µ, LEU2, CUP1-MYC-His6-Ub)]	This study
yFR2912		MATa, his3Δ1, leu2Δ0, met15Δ0, ura3Δ0, ubp15Δ::KanMX4, NUP120::6HA-HIS3MX6, [pFR452; p(2µ, LEU2, CUP1-Ub)]	This study
yFR2913		MATa, his3Δ1, leu2Δ0, met15Δ0, ura3Δ0, ubp15Δ::KanMX4, NUP120::6HA-HIS3MX6, [pFR453; p(2µ, LEU2, CUP1-MYC-His6-Ub)]	This study
yFR2914		MATa, his3Δ1, leu2Δ0, met15Δ0, ura3Δ0, NUP145::6HA-HIS3MX6, [pFR452; p(2µ, LEU2, CUP1-Ub)]	This study
yFR2915		MATa, his3Δ1, leu2Δ0, met15Δ0, ura3Δ0, NUP145::6HA-HIS3MX6, [pFR453; p(2µ, LEU2, CUP1-MYC-His6-Ub)]	This study
yFR2916		MATa, his3Δ1, leu2Δ0, met15Δ0, ura3Δ0, ubp15Δ::KanMX4, NUP145::6HA-HIS3MX6, [pFR452; p(2µ, LEU2, CUP1-Ub)]	This study
yFR2917		MATa, his3Δ1, leu2Δ0, met15Δ0, ura3Δ0, ubp15Δ::KanMX4, NUP145::6HA-HIS3MX6, [pFR453; p(2µ, LEU2, CUP1-MYC-His6-Ub)]	This study
yFR2918		MATa, his3Δ1, leu2Δ0, met15Δ0, ura3Δ0, NUP159::6HA-HIS3MX6, [pFR452; p(2µ, LEU2, CUP1-Ub)]	This study
yFR2919		MATa, his3Δ1, leu2Δ0, met15Δ0, ura3Δ0, NUP159::6HA-HIS3MX6, [pFR453; p(2µ, LEU2, CUP1-MYC-His6-Ub)]	This study
yFR2920		MATa, his3Δ1, leu2Δ0, met15Δ0, ura3Δ0, ubp15Δ::KanMX4, NUP159::6HA-HIS3MX6, [pFR452; p(2µ, LEU2, CUP1-Ub)]	This study
yFR2921		MATa, his3Δ1, leu2Δ0, met15Δ0, ura3Δ0, ubp15Δ::KanMX4, NUP159::6HA-HIS3MX6, [pFR453; p(2µ, LEU2, CUP1-MYC-His6-Ub)]	This study
yFR2711		MATa, his3Δ1, leu2Δ0, met15Δ0, ura3Δ0, HPR1::6HA-HIS3MX6, [pFR452; p(2µ, LEU2, CUP1-Ub)]	This study
yFR2712		MATa, his3Δ1, leu2Δ0, met15Δ0, ura3Δ0, HPR1::6HA-HIS3MX6, [pFR453; p(2µ, LEU2, CUP1-MYC-His6-Ub)]	This study
yFR2713		MATa, his3Δ1, leu2Δ0, met15Δ0, ura3Δ0, ubp15Δ::KanMX4, HPR1::6HA-HIS3MX6, [pFR452; p(2µ, LEU2, CUP1-Ub)]	This study
yFR2714		MATa, his3Δ1, leu2Δ0, met15Δ0, ura3Δ0, ubp15Δ::KanMX4, HPR1::6HA-HIS3MX6, [pFR453; p(2µ, LEU2, CUP1-MYC-His6-Ub)]	This study
yFR3026		MATa, his3Δ1, leu2Δ0, met15Δ0, ura3Δ0, NAB2::6HA-HIS3MX6, [pFR452; p(2µ, LEU2, CUP1-Ub)]	This study
yFR3027		MATa, his3Δ1, leu2Δ0, met15Δ0, ura3Δ0, NAB2::6HA-HIS3MX6, [pFR453; p(2µ, LEU2, CUP1-MYC-His6-Ub)]	This study
yFR3028		MATa, his3Δ1, leu2Δ0, met15Δ0, ura3Δ0, ubp15Δ::KanMX4, NAB2::6HA-HIS3MX6, [pFR452; p(2µ, LEU2, CUP1-Ub)]	This study
yFR3029		MATa, his3Δ1, leu2Δ0, met15Δ0, ura3Δ0, ubp15Δ::KanMX4, NAB2::6HA-HIS3MX6, [pFR453; p(2µ, LEU2, CUP1-MYC-His6-Ub)]	This study
yFR3008		MATa, his3Δ1, leu2Δ0, met15Δ0, ura3Δ0, NPL3::6HA-HIS3MX6, [pFR452; p(2µ, LEU2, CUP1-Ub)]	This study
yFR3009		MATa, his3Δ1, leu2Δ0, met15Δ0, ura3Δ0, NPL3::6HA-HIS3MX6, [pFR453; p(2µ, LEU2, CUP1-MYC-His6-Ub)]	This study
yFR3010		MATa, his3Δ1, leu2Δ0, met15Δ0, ura3Δ0, ubp15Δ::KanMX4, NPL3::6HA-HIS3MX6, [pFR452; p(2µ, LEU2, CUP1-Ub)]	This study
yFR3011		MATa, his3Δ1, leu2Δ0, met15Δ0, ura3Δ0, ubp15Δ::KanMX4, NPL3::6HA-HIS3MX6, [pFR453; p(2µ, LEU2, CUP1-MYC-His6-Ub)]	This study
yFR3022		MATa, his3Δ1, leu2Δ0, met15Δ0, ura3Δ0, MTR2::6HA-HIS3MX6, [pFR452; p(2µ, LEU2, CUP1-Ub)]	This study
yFR3023		MATa, his3Δ1, leu2Δ0, met15Δ0, ura3Δ0, MTR2::6HA-HIS3MX6, [pFR453; p(2µ, LEU2, CUP1-MYC-His6-Ub)]	This study
yFR3024		MATa, his3Δ1, leu2Δ0, met15Δ0, ura3Δ0, ubp15Δ::KanMX4, MTR2::6HA-HIS3MX6, [pFR452; p(2µ, LEU2, CUP1-Ub)]	This study
yFR3025		MATa, his3Δ1, leu2Δ0, met15Δ0, ura3Δ0, ubp15Δ::KanMX4, MTR2::6HA-HIS3MX6, [pFR453; p(2µ, LEU2, CUP1-MYC-His6-Ub)]	This study
yFR2795		MATa, his3Δ1, leu2Δ0, met15Δ0, ura3Δ0, Mex67::6xGLY-3xFlag-hphMX4	This study
yFR2888		MATa, his3Δ1, leu2Δ0, met15Δ0, ura3Δ0, ubp15D::KanMX4, Mex67::6xGLY-3xFlag-hphMX4	This study
