# Supplementary material for: The deubiquitylase Ubp15 couples transcription to mRNA export
Source: eLife. 2020 Nov 23;9:e61264. doi: 10.7554/eLife.61264 (PMC7682988; doi:10.7554/eLife.61264)
Supplement: Supplementary file 4. [file elife-61264-supp4.xlsx]

## Sheet: Sheet1
Name	Alias	Description	Source
pFR399		CEN, HIS3, RPB1-TAP	B. Coulombe
pFR2	pRS313	CEN, HIS3	Sikorski and Hieter, 1989
pFR559		CEN, HIS3, UBP15-3Flag	This study
pFR560		CEN, HIS3, UBP15-C214A-3Flag	This study
pFR452	pUB175	2u, URA3, CUP1-Ub	D. Finley
pFR453	pUB221	2u, URA3, CUP1-Myc-6His-Ub	D. Finley
